# Supplementary material
Source: MDPI journal article supplement (https://www.mdpi.com/2076-3417/11/16/7405)
Supplement: s1 [file s1]

# Supplementary Materials: The Association of Salivary Conductivity with Cardiomegaly in Hemodialysis Patients

An-Ting Lee <sup>1,†</sup>, Yen-Pei Lu <sup>2,†</sup>, Chun-Hao Chen <sup>3</sup>, Chia-Hao Chang <sup>4</sup>, Yuan-Hsiung Tsai <sup>5</sup>, Chun-Wu Tung <sup>6,7,\*</sup> and Jen-Tsung Yang <sup>8,9,\*</sup>

## 1. Supplementary Information

**Table S1.** Values of all three measurement of salivary conductivity.

| Cardiomegaly Group |           |           |           |           |         |      |
|--------------------|-----------|-----------|-----------|-----------|---------|------|
| ID                 | Dataset 1 | Dataset 2 | Dataset 3 | Mean      | SD      | CV%  |
| 1                  | 5620.94   | 5718.87   | 5618.87   | 5652.89   | 57.147  | 1.67 |
| 4                  | 5125.73   | 5173.655  | 5205.605  | 5168.33   | 40.203  | 0.78 |
| 5                  | 7203.35   | 7303.35   | 7292.7    | 7266.467  | 54.919  | 0.76 |
| 7                  | 5527.2    | 5367.2    | 5533.08   | 5475.827  | 94.119  | 1.72 |
| 8                  | 4183.24   | 4303.05   | 4216.9    | 4234.397  | 61.792  | 1.46 |
| 14                 | 9606.565  | 9758.32   | 9792.7    | 9719.195  | 99.044  | 1.02 |
| 19                 | 12,953.21 | 13,091.13 | 12,911.13 | 12,985.16 | 94.156  | 0.73 |
| 23                 | 7002.73   | 6962.795  | 6970.78   | 6978.768  | 21.132  | 0.3  |
| 26                 | 5581.005  | 5672.955  | 5552.955  | 5602.305  | 62.772  | 1.12 |
| 33                 | 6164.07   | 6141.1    | 6148.095  | 6151.088  | 11.774  | 0.19 |
| 34                 | 4886.115  | 4926.05   | 4934.04   | 4915.402  | 25.676  | 0.52 |
| 40                 | 5756.725  | 5788.67   | 5828.61   | 5791.335  | 36.017  | 0.62 |
| 42                 | 7106.565  | 7058.64   | 7226.37   | 7130.525  | 86.394  | 1.21 |
| 43                 | 7018.705  | 7104.68   | 6964.68   | 7029.355  | 70.605  | 1    |
| 49                 | 6579.405  | 6571.42   | 6587.395  | 6579.407  | 7.988   | 0.12 |
| 51                 | 6716.9    | 6771.1    | 6827.01   | 6771.67   | 55.057  | 0.81 |
| 52                 | 4686.435  | 4782.28   | 4798.255  | 4755.657  | 60.478  | 1.27 |
| 60                 | 5551.13   | 5469.185  | 5451.13   | 5490.482  | 53.293  | 0.97 |
| 62                 | 8743.945  | 8735.955  | 8704.005  | 8727.968  | 21.134  | 0.24 |
| 63                 | 13,256.73 | 13,208.8  | 13,192.83 | 13,219.45 | 33.255  | 0.25 |
| 69                 | 6787.075  | 6842.985  | 6835      | 6821.687  | 30.239  | 0.44 |
| 72                 | 9926.05   | 9958      | 9973.975  | 9952.675  | 24.402  | 0.25 |
| 73                 | 10636.92  | 10764.71  | 10844.6   | 10748.74  | 104.757 | 0.97 |
| 74                 | 5740.75   | 5868.545  | 5908.48   | 5839.258  | 87.616  | 1.5  |
| 77                 | 6259.92   | 6291.865  | 6267.905  | 6273.23   | 16.625  | 0.27 |
| 78                 | 4918.065  | 4951.5    | 4965.99   | 4945.185  | 24.579  | 0.5  |
| 83                 | 10,748.74 | 11,052.25 | 11,172.06 | 10,991.02 | 218.202 | 1.99 |
| 90                 | 6723.175  | 6978.765  | 7106.565  | 6936.168  | 195.212 | 2.81 |
| 95                 | 6291.865  | -         | -         | 6291.865  | -       | -    |
| 100                | 4334.995  | 4342.985  | 4350.97   | 4342.983  | 7.988   | 0.18 |
| 101                | 7889.31   | 7947.2    | 7953.21   | 7929.907  | 35.286  | 0.44 |
| 104                | 4247.14   | 4446.82   | 4470.78   | 4388.247  | 122.788 | 2.8  |
| 109                | 4558.64   | 4622.535  | 4674.6    | 4618.592  | 58.08   | 1.26 |
| 110                | 5820.62   | 5856.42   | 5896.64   | 5857.893  | 38.031  | 0.65 |
| 113                | 9087.395  | 9319.025  | 9390.91   | 9265.777  | 158.609 | 1.71 |
| 114                | 6188.035  | 6204.005  | 6259.92   | 6217.32   | 37.747  | 0.61 |
| 115                | 8256.725  | 8444.3    | 8496.34   | 8399.122  | 126.034 | 1.5  |
| 116                | 5876.53   | 5892.505  | 5908.48   | 5892.505  | 15.975  | 0.27 |

|      |          |          |          |          |         |       |
|------|----------|----------|----------|----------|---------|-------|
| 120  | 8999.535 | 8991.545 | 8967.585 | 8986.222 | 16.627  | 0.19  |
| 123  | 8232.76  | 8168.865 | 6819.84  | 7740.488 | 797.945 | 10.31 |
| 124  | 4630.525 | 4638.51  | 4654.485 | 4641.173 | 12.2    | 0.26  |
| 129  | 7266.305 | 7282.28  | 7253.35  | 7267.312 | 14.491  | 0.2   |
| Mean | 6968.85  | 7043.29  | 7022.65  | 6999.71  |         |       |
| SD   | 2215.28  | 2258.76  | 2247.73  | 2221.09  |         |       |
| CV%  | 31.79    | 32.07    | 32.01    | 31.73117 |         |       |

## Non-Cardiomegaly Group

|    |           |           |           |           |         |      |
|----|-----------|-----------|-----------|-----------|---------|------|
| 2  | 5944.3    | 5972.38   | 5988.35   | 5968.343  | 22.301  | 0.37 |
| 3  | 12,208.51 | 12,122.54 | 12,068.51 | 12,133.19 | 70.605  | 0.58 |
| 6  | 5289.75   | 5397.3    | 5407.85   | 5364.967  | 65.353  | 1.22 |
| 9  | 4662.475  | 4702.41   | 4646.5    | 4670.462  | 28.798  | 0.62 |
| 10 | 8144.9    | 8184.84   | 8240.75   | 8190.163  | 48.146  | 0.59 |
| 11 | 7218.385  | 7234.36   | 7253.35   | 7235.365  | 17.504  | 0.24 |
| 12 | 8871.74   | 8943.625  | 9015.51   | 8943.625  | 71.885  | 0.8  |
| 13 | 12,937.24 | 13,088.99 | 13,160.88 | 13,062.37 | 114.172 | 0.87 |
| 15 | 14590.59  | 14,646.5  | 14,678.45 | 14,638.51 | 44.471  | 0.3  |
| 16 | 6563.43   | 6507.395  | 6667.395  | 6579.407  | 81.188  | 1.23 |
| 17 | 8983.56   | 9047.46   | 9059.45   | 9030.157  | 40.797  | 0.45 |
| 18 | 8073.015  | 8128.925  | 8152.89   | 8118.277  | 40.988  | 0.5  |
| 20 | 7458      | 7689.63   | 7729.565  | 7625.732  | 146.626 | 1.92 |
| 21 | 4406.88   | 4324.935  | 4424.935  | 4385.583  | 53.293  | 1.22 |
| 22 | 10179.5   | 10,157.68 | 10,173.66 | 10,170.28 | 11.296  | 0.11 |
| 24 | 12,194.42 | 12,354.17 | 12,418.07 | 12,322.22 | 115.197 | 0.93 |
| 25 | 12,098.58 | 12,122.54 | 12,074.62 | 12,098.58 | 23.96   | 0.2  |
| 27 | 7114.55   | 7154.485  | 7174.6    | 7147.878  | 30.565  | 0.43 |
| 28 | 5948.415  | 6251.93   | 6435.635  | 6211.993  | 246.053 | 3.96 |
| 29 | 8783.88   | 8863.75   | 8855.765  | 8834.465  | 43.989  | 0.5  |
| 30 | 9382.92   | 9526.69   | 9590.59   | 9500.067  | 106.364 | 1.12 |
| 31 | 6563.43   | 6507.52   | 6467.585  | 6512.845  | 48.144  | 0.74 |
| 32 | 9177.55   | 9159.28   | 9143.305  | 9160.045  | 17.135  | 0.19 |
| 35 | 3735.955  | 3799.855  | 3831.805  | 3789.205  | 48.804  | 1.29 |
| 36 | 6227.97   | 6275.89   | 6299.855  | 6267.905  | 36.602  | 0.58 |
| 37 | 4862.155  | 5053.845  | 5117.745  | 5011.248  | 133.013 | 2.65 |
| 38 | 8759.92   | 9015.51   | 9071.42   | 8948.95   | 166.074 | 1.86 |
| 39 | 7394.105  | 7537.875  | 7649.695  | 7527.225  | 128.127 | 1.7  |
| 41 | 5660.875  | 5756.725  | 5748.735  | 5722.112  | 53.183  | 0.93 |
| 44 | 4334.995  | 4406.88   | 4478.765  | 4406.88   | 71.885  | 1.63 |
| 45 | 8743.945  | 8879.725  | 8847.775  | 8823.815  | 70.99   | 0.8  |
| 46 | 12,354.17 | 12458     | 12,505.93 | 12,439.36 | 77.577  | 0.62 |
| 47 | 4654.485  | 4674.6    | 4702.41   | 4677.165  | 24.065  | 0.51 |
| 48 | 10,700.81 | 10,860.56 | 10,944.3  | 10,835.22 | 123.707 | 1.14 |
| 50 | 7545.86   | 7609.76   | 7697.615  | 7617.745  | 76.192  | 1    |
| 53 | 5069.82   | 5149.695  | 5181.645  | 5133.72   | 57.599  | 1.12 |
| 54 | 8344.58   | 8448.415  | 8483.65   | 8425.548  | 72.3    | 0.86 |
| 55 | 10,205.61 | 10,211.52 | 10,311.52 | 10,242.88 | 59.515  | 0.58 |
| 56 | 6938.83   | 7142.12   | 6735.54   | 6938.83   | 203.29  | 2.93 |
| 57 | 7833.4    | 7881.325  | 7873.335  | 7862.687  | 25.676  | 0.33 |
| 58 | 8829.725  | 8929.725  | 8927.65   | 8895.7    | 57.145  | 0.64 |
| 59 | 6211.995  | 6363.75   | 6371.74   | 6315.828  | 90.011  | 1.43 |
| 61 | 12,034.68 | -         | -         | 12,034.68 | -       | -    |
| 64 | 8144.9    | 8336.595  | 8368.545  | 8283.347  | 120.958 | 1.46 |

|      |           |           |           |           |         |      |
|------|-----------|-----------|-----------|-----------|---------|------|
| 65   | 5748.735  | 5804.645  | 5812.635  | 5788.672  | 34.816  | 0.6  |
| 66   | 10,636.92 | 10,620.94 | 10,604.97 | 10,620.94 | 15.975  | 0.15 |
| 67   | 10,037.88 | 10,093.79 | 10,109.76 | 10,080.47 | 37.744  | 0.37 |
| 68   | 8206.915  | 8066.915  | 8120.94   | 8131.59   | 70.605  | 0.87 |
| 70   | 7513.91   | 7561.835  | 7569.82   | 7548.522  | 30.239  | 0.4  |
| 71   | 6204.005  | 6184.5    | 6188.035  | 6192.18   | 10.392  | 0.17 |
| 75   | 8176.85   | 8232.76   | 8280.685  | 8230.098  | 51.969  | 0.63 |
| 76   | 7253.35   | 7354.165  | 7386.115  | 7331.21   | 69.295  | 0.95 |
| 79   | 6403.69   | 6435.635  | 6443.625  | 6427.65   | 21.131  | 0.33 |
| 80   | 6936.88   | 6876.88   | 6874.935  | 6896.232  | 35.216  | 0.51 |
| 81   | 5644.9    | 5660.875  | 5716.785  | 5674.187  | 37.746  | 0.67 |
| 82   | 5984.325  | 6024.325  | 6036.275  | 6014.975  | 27.208  | 0.45 |
| 84   | 6259.92   | 6315.83   | 6283.88   | 6286.543  | 28.05   | 0.45 |
| 85   | 4063.43   | 4089.45   | 4029.45   | 4060.777  | 30.088  | 0.74 |
| 86   | 9896.05   | 9956.05   | 9886.115  | 9912.738  | 37.837  | 0.38 |
| 87   | 7537.875  | 7266.305  | 7258.32   | 7354.167  | 159.146 | 2.16 |
| 88   | 9047.46   | 9143.305  | 9138.15   | 9109.638  | 53.91   | 0.59 |
| 89   | 7737.555  | 7841.385  | 7913.27   | 7830.737  | 88.34   | 1.13 |
| 91   | 7234.36   | 7258.32   | 7226.37   | 7239.683  | 16.627  | 0.23 |
| 92   | 7515.75   | 7575.97   | 7537.875  | 7543.198  | 30.461  | 0.4  |
| 93   | 7789.75   | 7868.5    | 7889.31   | 7849.187  | 52.515  | 0.67 |
| 94   | 7402.09   | 7371.4    | 7394.105  | 7389.198  | 15.922  | 0.22 |
| 96   | 7897.3    | 7896.55   | 7977.17   | 7923.673  | 46.331  | 0.58 |
| 97   | 7346.18   | 7398.24   | 7358.02   | 7367.48   | 27.289  | 0.37 |
| 98   | 7386.115  | 8684.5    | 8719.98   | 8263.532  | 760.072 | 9.2  |
| 99   | 7371.4    | 7545.86   | 7617.745  | 7511.668  | 126.682 | 1.69 |
| 102  | 11,023    | -         | -         | 11,023    | -       | -    |
| 103  | 14,486.76 | 14,518.71 | 14,542.67 | 14,516.04 | 28.05   | 0.19 |
| 105  | 7282.28   | 7410.75   | 7451.5    | 7381.51   | 88.318  | 1.2  |
| 106  | 5844.58   | 6004.325  | 6062.35   | 5970.418  | 112.775 | 1.89 |
| 107  | 7769.5    | 7913.27   | 7969.185  | 7883.985  | 103.013 | 1.31 |
| 108  | 8096.98   | 8256.725  | 8240.75   | 8198.152  | 87.981  | 1.07 |
| 111  | 8719.98   | 8672.06   | 8684.5    | 8692.18   | 24.866  | 0.29 |
| 112  | 6858.96   | 6898.895  | 6890.91   | 6882.922  | 21.132  | 0.31 |
| 117  | 7761.515  | 7889.31   | 7993.145  | 7881.323  | 116.021 | 1.47 |
| 118  | 9713.95   | 9774.295  | 9792.7    | 9760.315  | 41.194  | 0.42 |
| 119  | 9926.05   | 9973.975  | 10029.9   | 9976.64   | 51.976  | 0.52 |
| 121  | 4071.42   | 4098.8    | 4119.345  | 4096.522  | 24.044  | 0.59 |
| 122  | 5828.61   | 5852.57   | 5860.555  | 5847.245  | 16.625  | 0.28 |
| 125  | 7907.85   | 7973.11   | 7933.32   | 7938.09   | 32.891  | 0.41 |
| 126  | 4263.115  | 4247.14   | 4287.075  | 4265.777  | 20.1    | 0.47 |
| 127  | 4834.275  | 4862.155  | 4874.055  | 4856.828  | 20.418  | 0.42 |
| 128  | 3691.13   | 3641.1    | 3637.01   | 3656.413  | 30.135  | 0.82 |
| Mean | 7778.14   | 7764.68   | 7784.96   | 7833.52   |         |      |
| SD   | 2369.84   | 2333.16   | 2335.62   | 2372.98   |         |      |
| CV%  | 30.47     | 30.048    | 30.00     | 30.29     |         |      |

Abbreviations: CV, coefficient of variation; ID, patient identification number; SD, standard deviation.

**Table S2.** Baseline demographics of cardiomegaly patients and age-, and sex-matched controls (*n* = 84).

| Variable                                  | Overall<br>( <i>N</i> = 84) | Age, Sex-Matched<br>Controls ( <i>N</i> = 42) | Cardiomegaly<br>( <i>N</i> = 42) | <i>p</i> Value |
|-------------------------------------------|-----------------------------|-----------------------------------------------|----------------------------------|----------------|
| Demographics                              |                             |                                               |                                  |                |
| Age, years                                | 61.69 ± 9.97                | 61.26 ± 9.60                                  | 62.12 ± 10.43                    | 0.70           |
| Female sex, <i>n</i> (%)                  | 38 (45.2)                   | 19 (45.2)                                     | 19 (45.2)                        | 1.00           |
| Height, cm                                | 160.79 ± 9.10               | 162.17 ± 9.25                                 | 159.41 ± 8.83                    | 0.17           |
| Weight, kg                                | 65.00 ± 13.60               | 65.34 ± 14.20                                 | 64.65 ± 13.13                    | 0.82           |
| Underlying disease                        |                             |                                               |                                  |                |
| Hypertension, <i>n</i> (%)                | 77 (91.7)                   | 38 (90.5)                                     | 39 (92.9)                        | 0.69           |
| Diabetes mellitus, <i>n</i> (%)           | 53 (63.1)                   | 26 (61.9)                                     | 27 (64.3)                        | 0.82           |
| Hyperlipidemia, <i>n</i> (%)              | 36 (42.9)                   | 17 (40.5)                                     | 19 (45.2)                        | 0.66           |
| Gouty arthritis, <i>n</i> (%)             | 24 (28.6)                   | 9 (21.4)                                      | 15 (35.7)                        | 0.15           |
| Coronary arterial disease, <i>n</i> (%)   | 15 (17.9)                   | 8 (19.0)                                      | 7 (16.7)                         | 0.78           |
| Atrial fibrillation, <i>n</i> (%)         | 9 (10.7)                    | 3 (7.1)                                       | 6 (14.3)                         | 0.29           |
| Liver disease, <i>n</i> (%)               | 29 (34.5)                   | 14 (33.3)                                     | 15 (35.7)                        | 0.82           |
| Old stroke, <i>n</i> (%)                  | 9 (10.7)                    | 3 (7.1)                                       | 6 (14.3)                         | 0.29           |
| Laboratory parameters                     |                             |                                               |                                  |                |
| BUN, mg/dL                                | 68.40 ± 17.11               | 69.98 ± 18.33                                 | 66.83 ± 15.85                    | 0.40           |
| Creatinine, mg/dL                         | 10.30 ± 2.08                | 10.49 ± 2.13                                  | 10.10 ± 1.96                     | 0.39           |
| BUN/Cr ratio                              | 6.80 ± 1.76                 | 6.79 ± 1.63                                   | 6.82 ± 1.90                      | 0.99           |
| eGFR, mL/min/1.73 m <sup>2</sup>          | 4.73 ± 1.16                 | 4.66 ± 1.27                                   | 4.80 ± 1.05                      | 0.23           |
| Serum osmolality, mOsm/kgH <sub>2</sub> O | 310.20 ± 11.21              | 312.57 ± 10.75                                | 307.83 ± 11.28                   | 0.05*          |
| Glucose, mg/dL                            | 135.04 ± 78.03              | 136.74 ± 91.19                                | 133.33 ± 63.28                   | 0.69           |
| Sodium, mEq/L                             | 136.70 ± 3.81               | 137.52 ± 3.46                                 | 135.88 ± 4.01                    | 0.05*          |
| Potassium, mEq/L                          | 4.43 ± 0.74                 | 4.34 ± 0.75                                   | 4.51 ± 0.74                      | 0.30           |
| Cardiothoracic ratio                      | 0.50 ± 0.06                 | 0.45 ± 0.03                                   | 0.55 ± 0.04                      | <0.01*         |
| Salivary conductivity, µs/cm              | 7480.58 ± 1890.20           | 7961.45 ± 1351.23                             | 6999.71 ± 2221.09                | <0.01*         |
| Thirst intensity scale scores             |                             |                                               |                                  |                |
| Thirst scale (VAS)                        | 3.11 ± 2.63                 | 3.02 ± 2.64                                   | 3.19 ± 2.65                      | 0.77           |
| Thirst scale (CS)                         | 2.86 ± 1.56                 | 2.81 ± 1.61                                   | 2.90 ± 1.53                      | 0.69           |

Values are expressed as mean ± standard deviation or number (percentage). Abbreviations: BUN, blood urea nitrogen; BUN/Cr ratio, blood urea nitrogen to creatinine ratio; eGFR, estimated glomerular filtration rate.
